# Supplementary material for: Connexin Restrains EMT by Dual-Domain Mechanisms to Preserve Epithelial Identity
Source: Research Square preprint supplement (doi:10.21203/rs.3.rs-7501684/v1), 2025-11-27
Supplement: Supplementary file 1 [file 2bd1ac283a3a67a8bcd83173.pdf]

**Fig. S1**

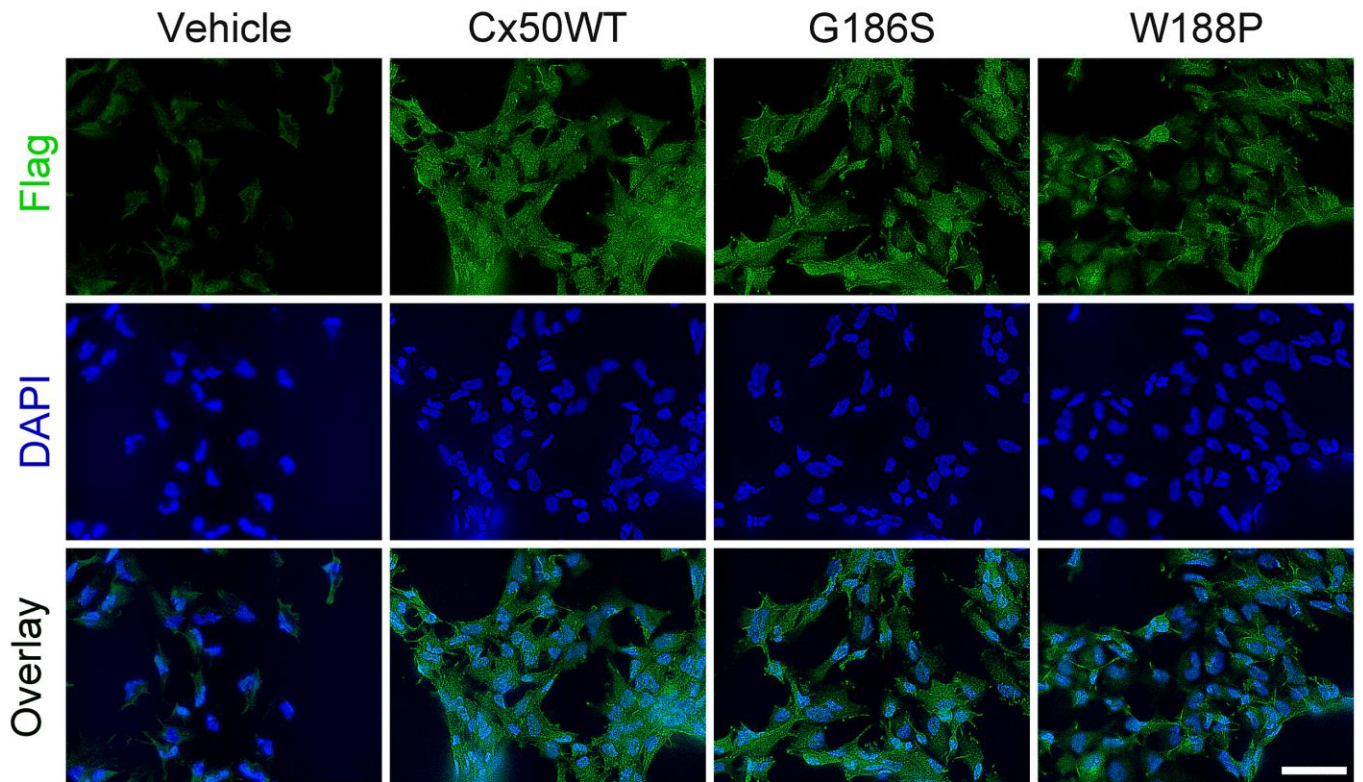

**Figure S1. Infection efficiency of recombinant retroviruses expressing WT Cx50 and Cx50 E2 domain mutants in CLCs.** Immunostaining was performed for exogenous Cx50 (Flag, green), with DAPI nuclear counterstaining (blue). Scale bar = 50  $\mu\text{m}$ .

**Fig. S2**

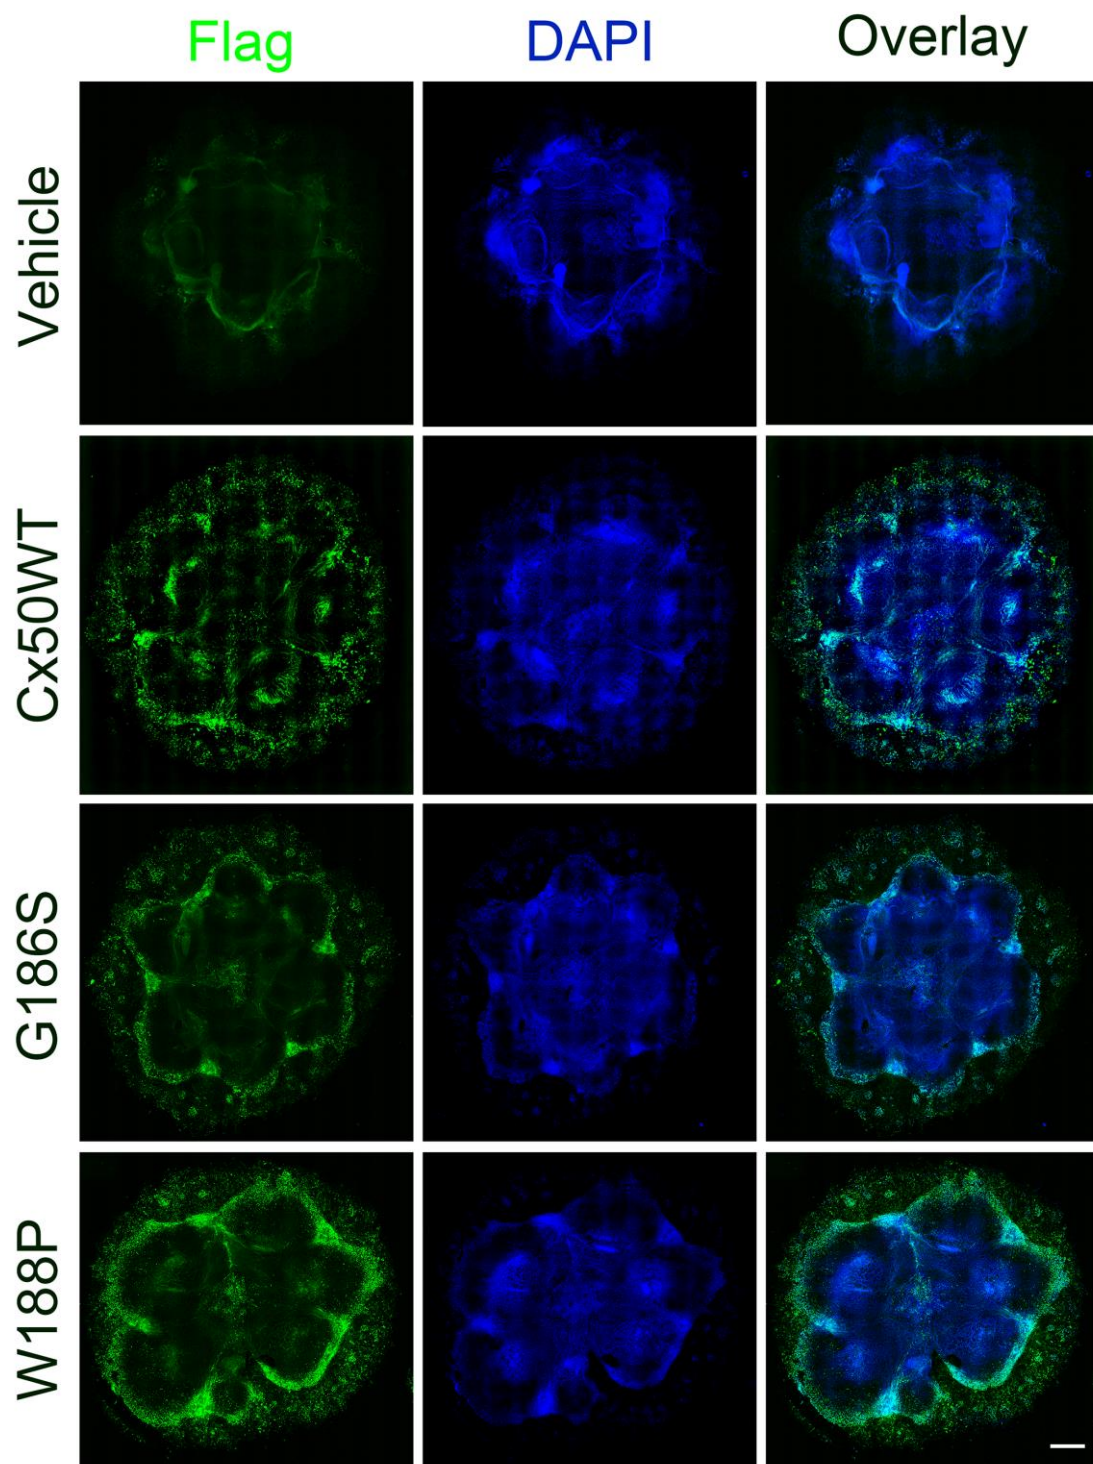

**Figure S2. Infection of recombinant retroviruses expressing WT Cx50 and Cx50 E2 domain mutants in chick embryo lens capsular bag model.** Immunostaining was performed for exogenous Cx50 (Flag, green), with DAPI nuclear counterstaining (blue). Scale bar = 500  $\mu$ m.



**Fig. S3**

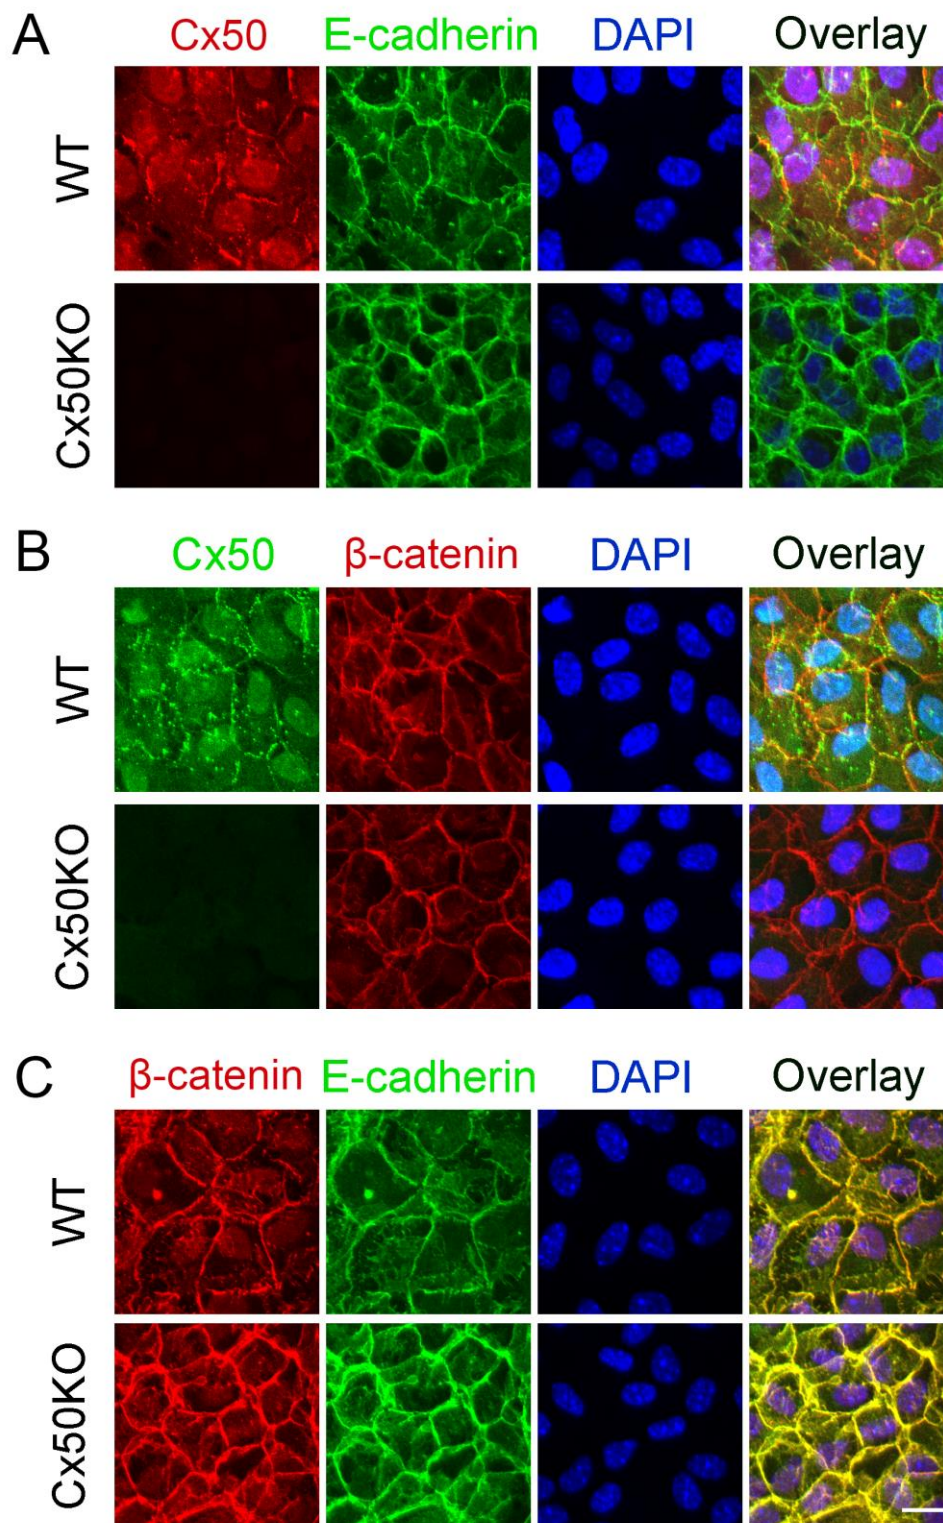

**Figure S3. Co-localization of Cx50, E-cadherin, and  $\beta$ -catenin in CLCs. (A)** Co-immunostaining for Cx50 (red), E-cadherin (green), with DAPI nuclear counterstaining (blue). **(B)** Co-immunostaining for Cx50 (green) and  $\beta$ -catenin (red), with DAPI nuclear counterstaining (blue). **(C)** Co-immunostaining for  $\beta$ -catenin (red) and E-cadherin (green), with DAPI nuclear counterstaining (blue). Scale bar = 10  $\mu$ m.

**Fig. S4**

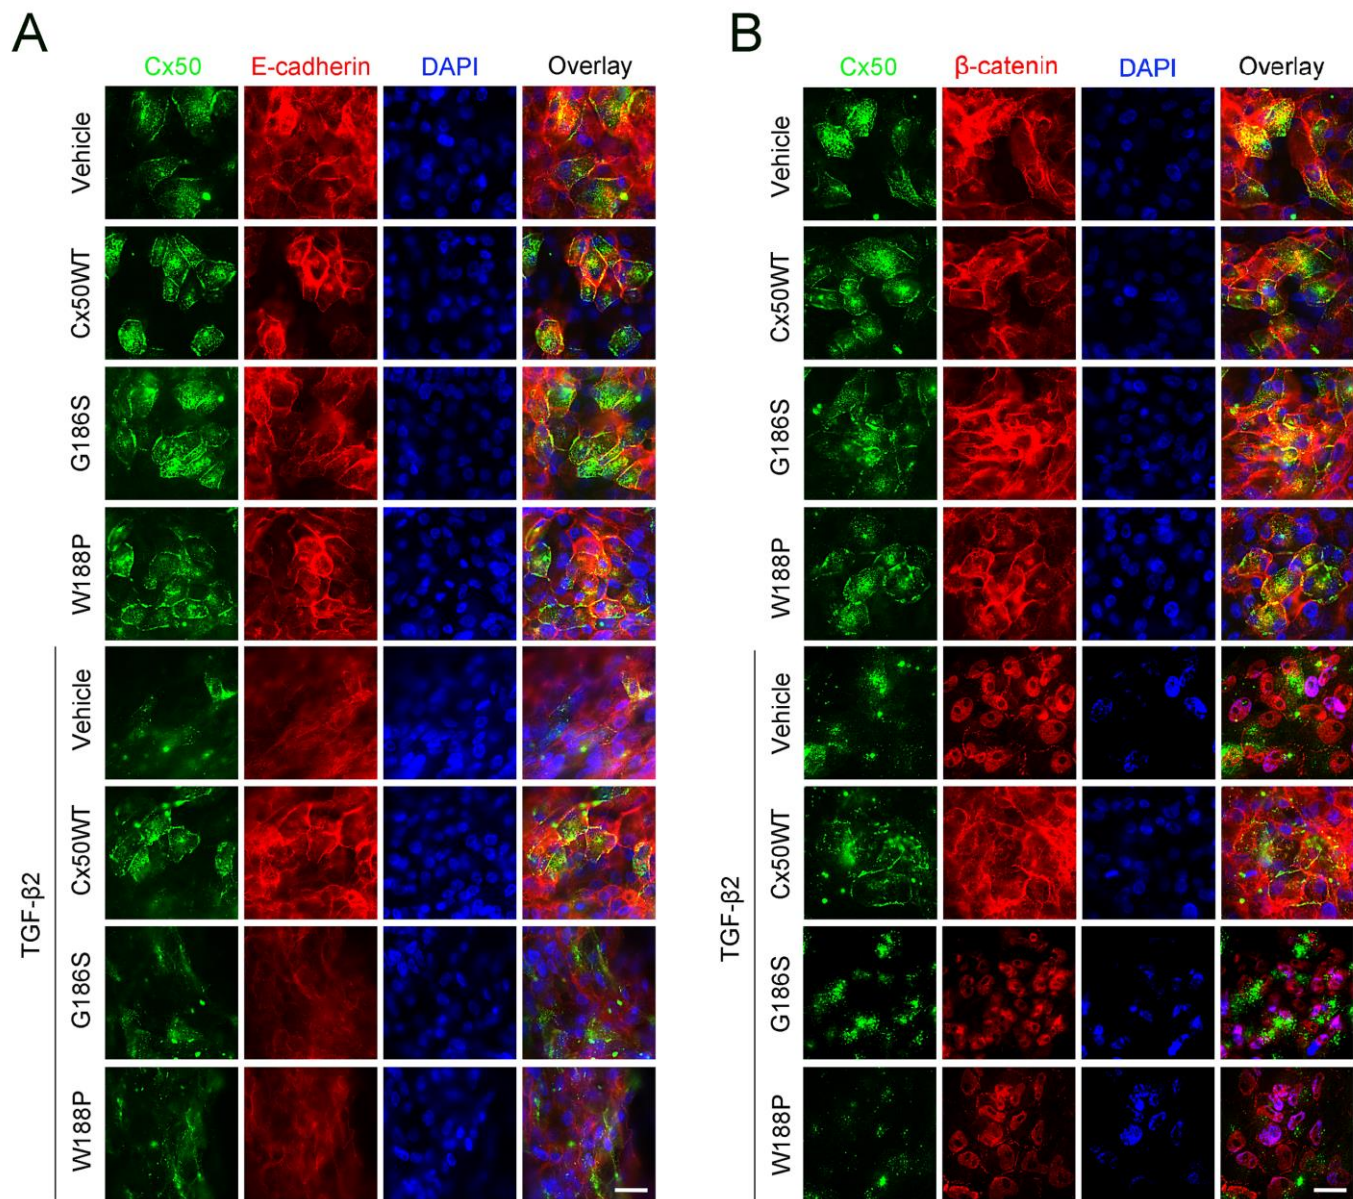

**Figure S4. Cx50 inhibits E-cadherin loss and  $\beta$ -catenin nuclear localization mediated by the Cx50 E2 domain.** (A) Primary chicken lens cell cultures were infected with recombinant retroviruses expressing WT Cx50 or the G186S and W188P mutants and treated with 10ng/mL TGF- $\beta$ 2. Co-immunostaining for Cx50 (green) and E-cadherin (red), with DAPI nuclear counterstaining (blue). Scale bar = 20  $\mu$ m. (B) Co-immunostaining for Cx50 (green) and  $\beta$ -catenin (red), with DAPI counterstaining (blue). Scale bar = 20  $\mu$ m.



**Fig. S5**

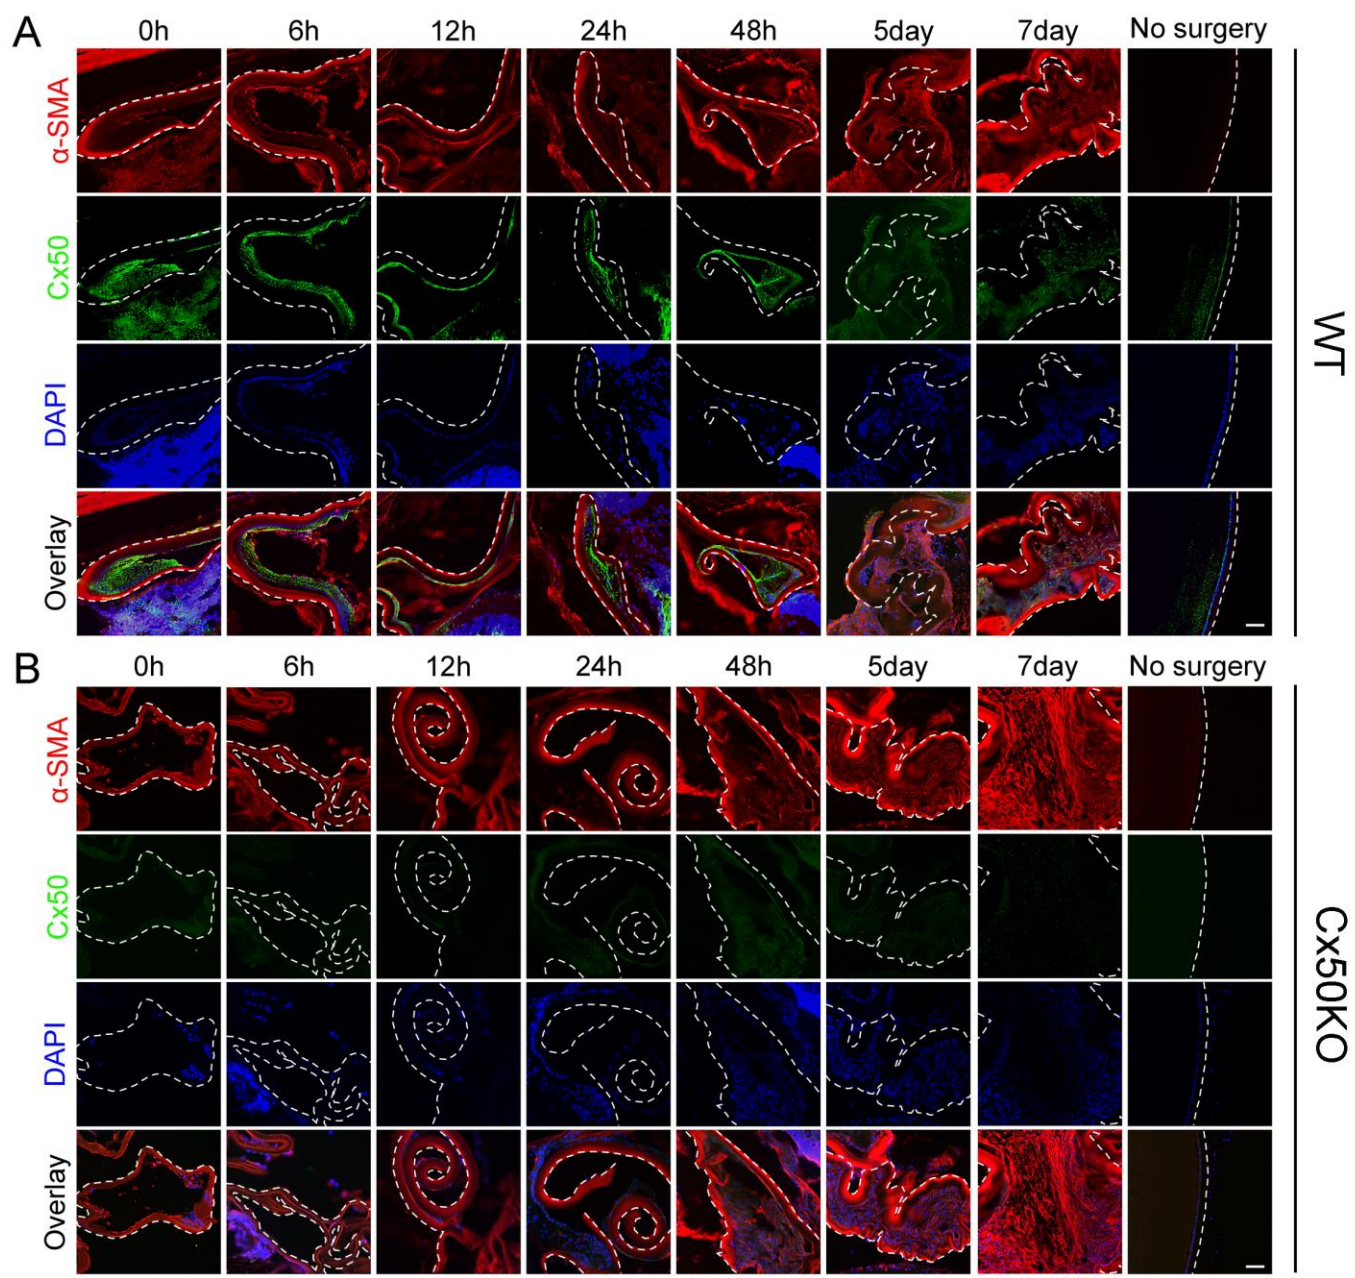

**Figure S5. Deletion of Cx50 increases EMT marker expression in a PCO mouse model. (A)** Co-immunostaining for Cx50 (green) and  $\alpha$ -SMA (red) in WT mouse lenses, with DAPI nuclear counterstaining (blue). Scale bar = 50  $\mu$ m. **(B)** Co-immunostaining for Cx50 (green) and  $\alpha$ -SMA (red) in Cx50KO mouse lenses, with DAPI nuclear counterstaining (blue). Scale bar = 50  $\mu$ m. White dashed lines outline the capsule.

Fig. S6

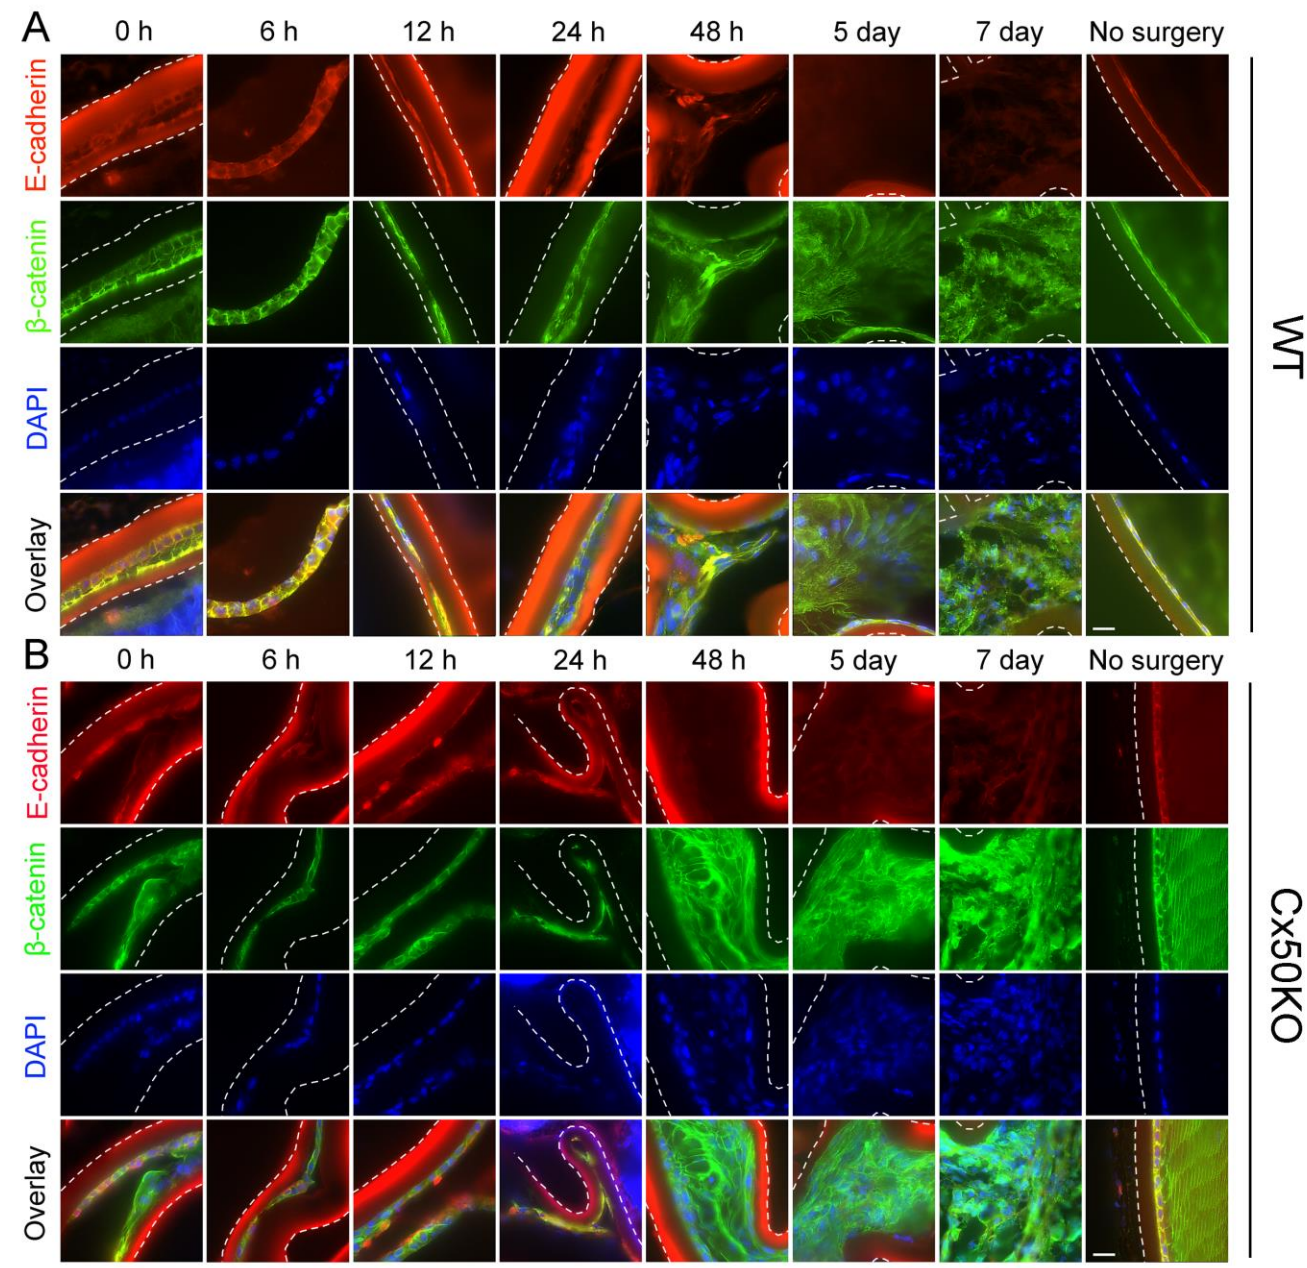

**Figure S6. Deletion of Cx50 increases E-cadherin loss and  $\beta$ -catenin nuclear localization in a PCO mouse model.** (A) Co-immunostaining for  $\beta$ -catenin (green) and E-cadherin (red) in WT mouse, with DAPI nuclear counterstaining (blue). Scale bar = 20  $\mu$ m. (B) Co-immunostaining for  $\beta$ -catenin (green) and E-cadherin (red) in Cx50 KO mouse, with DAPI nuclear counterstaining (blue). Scale bar = 20  $\mu$ m. White dashed lines outline the capsule.



**Fig. S7**

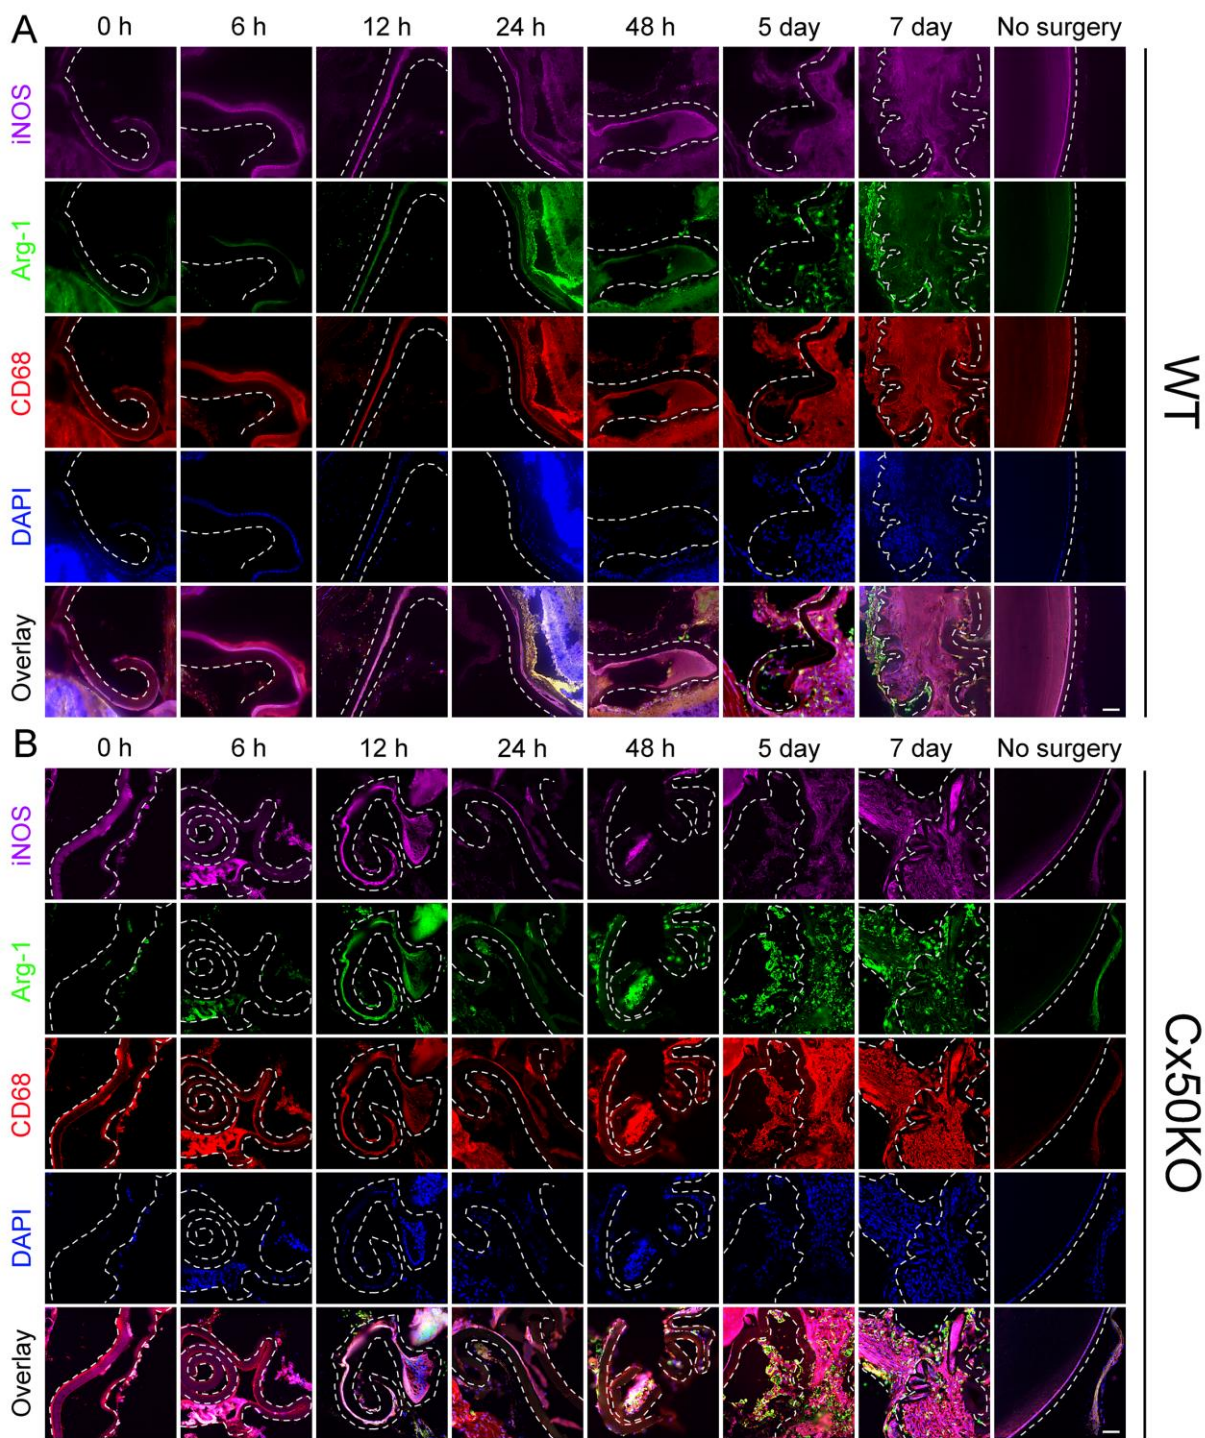

**Figure S7. Deletion of Cx50 increases macrophages recruitment in a PCO mouse model. (A)** Co-immunostaining for iNOS (purple), Arg-1 (green), and CD68 (red) in WT mouse lenses, DAPI nuclear counterstaining (blue). Scale bar = 50  $\mu$ m. **(B)** Co-immunostaining for iNOS (purple), Arg-1 (green), and CD68 (red) in Cx50KO mouse lenses, with DAPI nuclear counterstaining (blue). Scale bar = 50  $\mu$ m. White dashed lines outline the capsule.

**Fig. S8**

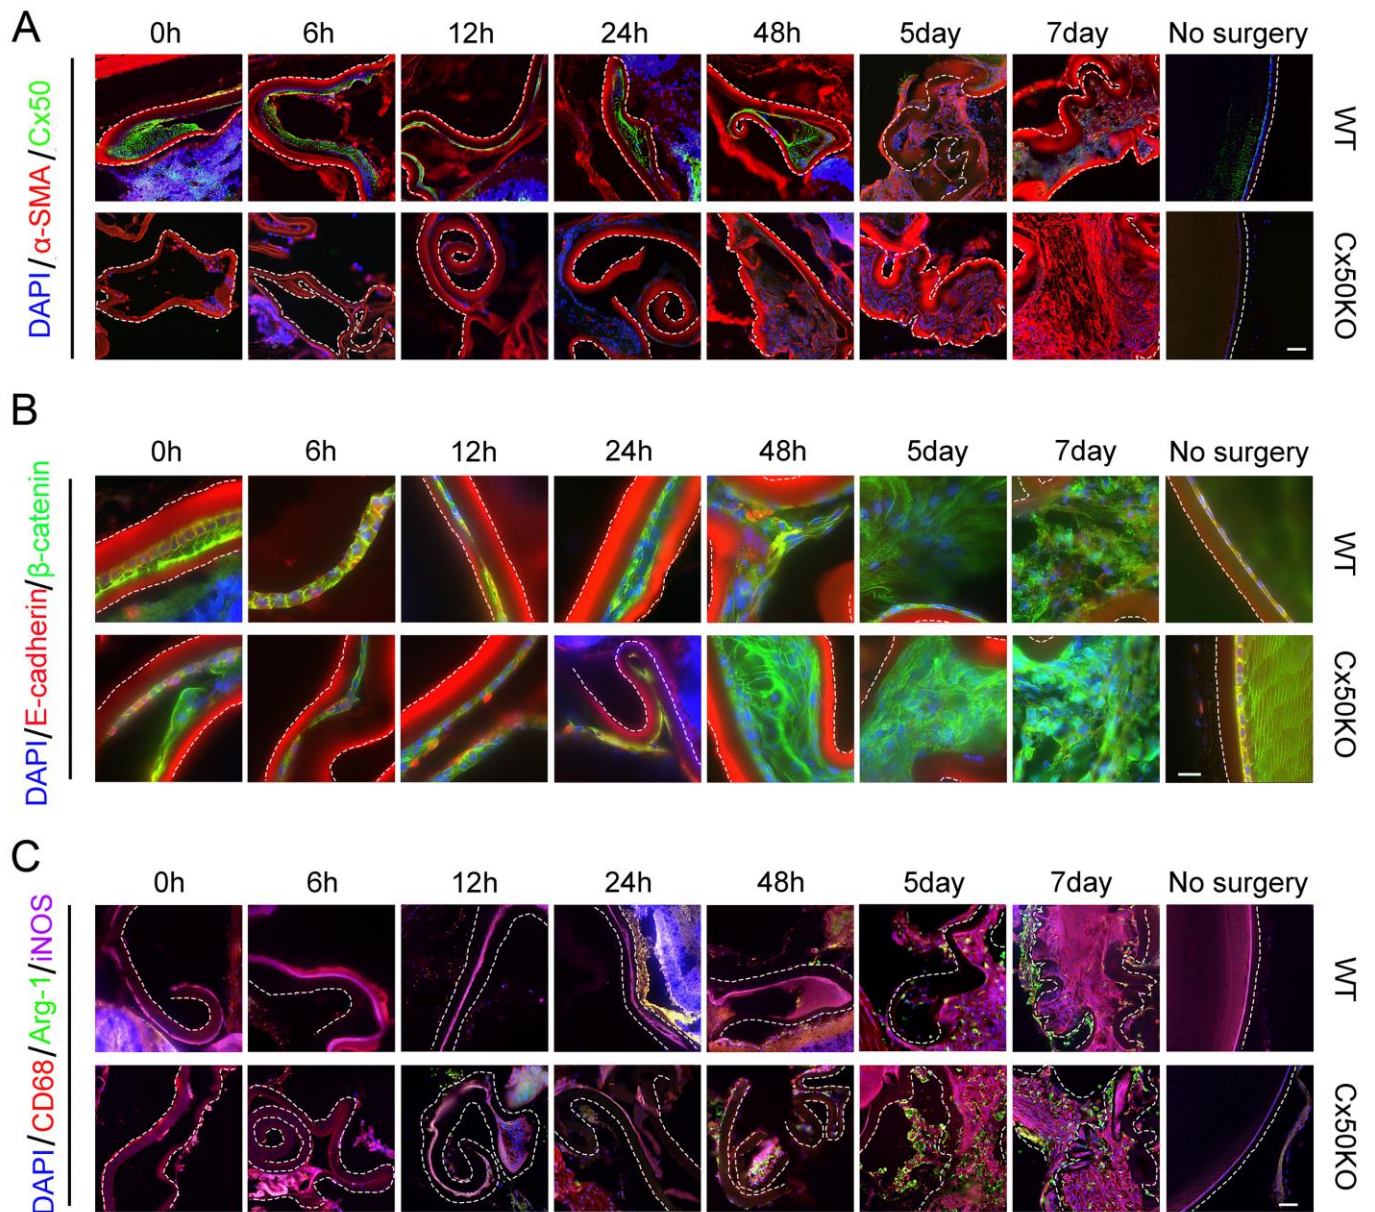

**Figure S8. Deletion of Cx50 increases EMT marker expression, E-cadherin loss,  $\beta$ -catenin nuclear localization, and macrophage recruitment in an *in vivo* PCO mouse model.** ECCE surgery was performed on WT and Cx50 KO to mimic PCO, and images were captured at various time points pos-surgery. **(A)** Co-immunostaining for Cx50 (green) and  $\alpha$ -SMA (red), with DAPI nuclear counterstaining (blue). Scale bar = 50  $\mu$ m. **(B)** Co-immunostaining for  $\beta$ -catenin (green) and E-cadherin (red), with DAPI nuclear counterstaining (blue). Scale bar = 20  $\mu$ m. **(C)** Co-immunostaining for iNOS (purple), Arg-1 (green), and CD68 (red), with DAPI nuclear counterstaining (blue). Scale bar = 50  $\mu$ m. White dashed lines outline the capsule.
